# Supplementary material for: Loss of polarity alters proliferation and differentiation in low-grade endometrial cancers by disrupting Notch signaling
Source: PubMed Central journal article supplement (PMC5716545; doi:10.1371/journal.pone.0189081), 2017-12-05
Supplement: pone.0189081.s001.pdf [file pone.0189081.s001.pdf]

Supplementary Table 1. Primers utilized for quantitative RT-PCR

| Name      | R/F    | Sequence                                            |
|-----------|--------|-----------------------------------------------------|
| HPRT      | F<br>R | AGCTTGCTGGTGAAAAGGAC<br>TTATAGTCAAGGGCATATCC        |
| Notch1 -1 | F<br>R | CAGCCCTTGTCTCCAGAATG<br>TTGGCACCGTTCTTACAGG         |
| Notch1 -2 | F<br>R | GGATGGCATCAATAGCTTCATG<br>CCAGGGTCACAGTCACATTTG     |
| Notch2 -1 | F<br>R | TCGGGATAGCTATGAGCCCT<br>GGCATGTTGCTTTCCCCAAC        |
| Notch2 -2 | F<br>R | ATTCATGCAGGTTAGAGAAGGAC<br>CTGTCTGAGAGCTCAGTGACCTTA |
| Notch3 -1 | F<br>R | ATCAACCGCTATGACTGTGTC<br>TCCATTTTCCCATCCACG         |
| Notch3 -2 | F<br>R | GCTGCGAAACTGATGTCAAC<br>GCTACTCTGACACTCATCCATG      |
| Notch4 -1 | F<br>R | AGTAACCCCTCAAACACAGC<br>ACAAATCCACACCCATCACC        |
| Notch4 -2 | F<br>R | GGTAAACCCATGTGAGTCCAG<br>AGTTCTGTCCATTGTAGCCTG      |
| JAG1 -1   | F<br>R | GAAAGTGCCAGAGCCTAAA<br>CAGGACAGCTGAAGAACTGAA        |
| JAG1 -2   | F<br>R | GAACCTGATTGCGAGCTACTAC<br>GGTGGACAGATACAGCGATAAC    |
| JAG2 -1   | F<br>R | GGACGCCAATGAATGTGAAG<br>CGGGATGCAGAGACAGTAATAG      |
| JAG2 -2   | F<br>R | ACCTGATTGGTGGCTATTACTG<br>CTGCCCATGACAGTCGTTTA      |
| DLL1 -1   | F<br>R | CCGATGACCTCACAAACAGAAA<br>CACACGAAGCGGTAGGAATAC     |
| DLL1 -2   | F<br>R | GCAGATCAAGAACACCAACAAG<br>GTCCAAAGGACAGCAAGA        |
| DLL3 -1   | F<br>R | GAATCACCTGAAGATGGAGAC<br>GCTCCAAAGGACAGCAAGA        |
| DLL3 -2   | F<br>R | CGGATGGACCTTGCTTCAAT<br>ACAGTTGGAGCCTTGGAATC        |
| DLL4 -1   | F<br>R | GCTCAAGAACACAAACCAGAAG<br>GGGCCAGATTATAGTCCAATGT    |
| DLL4 -2   | F<br>R | TCCACTGGCATCTGTGTTTC<br>CCTCCTCTCCTCTCTGATTT        |
| P21 -1    | F<br>R | CATCCTGGCCTGTACTGTT<br>CTTGCCCTTCAGAGGCTTATAG       |
| P21 -2    | F<br>R | AGCTGAACAAGGAGTCAGATG<br>CAGGGCCAGAAGAGACAATAA      |
| HeyL -1   | F<br>R | AGTTGATCTTGGGTTCACTCTC<br>ACCAGAAAGGCTTGGGAATAG     |
| HeyL -2   | F<br>R | GTTCTTCATCCAGGGAGCTCTAAA<br>GAGGAAGATGCCTTCACAGATAG |

|         |        |                                                      |
|---------|--------|------------------------------------------------------|
| Hey1 -1 | F<br>R | GCTATGGACTATCGGAGTTTGG<br>CTGGGAGGCGTAGTTGTTAAG      |
| Hey1 -2 | F<br>R | GCCCGATATCTGAGCATCATT<br>CGTAGTTGTTAAGGTGGGAGAC      |
| Hey2 -1 | F<br>R | GCGGCGAGATCGGATAAATAA<br>TGATCTACCGTCATTTGCAGTAT     |
| Hey2 -2 | F<br>R | AACATCTCAGATTATGGCAAGAAAG<br>CCAGTCGTCTCAACTCAGATAAA |
| Hes6 -1 | F<br>R | AAAGCGCGCCTAGACAAA<br>CCGTCTGGTCTTGTAACCTTGAT        |
| Hes6 -2 | F<br>R | CCAACACCTGTCGCTCTT<br>CTTGTAACCTTGATGCCCATGAC        |
